# Supplementary material for: Raman Spectroscopy Profiling of Splenic T-Cells in Sepsis and Endotoxemia in Mice
Source: MDPI journal article supplement (doi:10.3390/ijms241512027), 2023-07-27
Supplement: s1 [file s1]

# Raman Spectroscopy Profiling of Splenic T-Cells in Sepsis and Endotoxemia in Mice

Ibukun Elizabeth Osadare <sup>1</sup>, Ling Xiong <sup>2</sup>, Ignacio Rubio <sup>2,3,4</sup>, Ute Neugebauer <sup>1,2,5</sup>, Adrian T. Press <sup>2,3,4,6</sup>, Anuradha Ramoji <sup>1,5,\*</sup> and Juergen Popp <sup>1,5</sup>

<sup>1</sup> Institute of Physical Chemistry (IPC), Abbe Center of Photonics (ACP), Friedrich Schiller University Jena, Member of the Leibniz Centre for Photonics in Infection Research (LPI), Helmholtzweg 4, 07743 Jena, Germany; ibukun.osadare@uni-jena.de (I.E.O.); ute.neugebauer@med.uni-jena.de (U.N.); juergen.popp@ipht-jena.de (J.P.)

<sup>2</sup> Department of Anesthesiology and Intensive Care, Jena University Hospital, Friedrich Schiller University Jena, Am Klinikum 1, 07747 Jena, Germany; ling.xiong@med.uni-jena.de (L.X.); ignacio.rubio@med.uni-jena.de (I.R.); adrian.press@med.uni-jena.de (A.T.P.)

<sup>3</sup> Center for Sepsis Control and Care (CSCC), Jena University Hospital, Friedrich Schiller University Jena, Am Klinikum 1, 07747 Jena, Germany

<sup>4</sup> Leibniz Center for Photonics in Infection Research, Jena University Hospital, Friedrich Schiller University Jena, 07747 Jena, Germany

<sup>5</sup> Leibniz Institute of Photonic Technology, Member of Leibniz Health Technologies, Member of the Leibniz Centre for Photonics in Infection Research (LPI), Albert-Einstein-Straße 9, 07745 Jena, Germany

<sup>6</sup> Faculty of Medicine, Friedrich Schiller University Jena, Kastanienstraße. 1, 07747 Jena, Germany

\* Correspondence: anuradha.ramoji@uni-jena.de; Tel.: +49-3641-9390926

## Supplement Figures

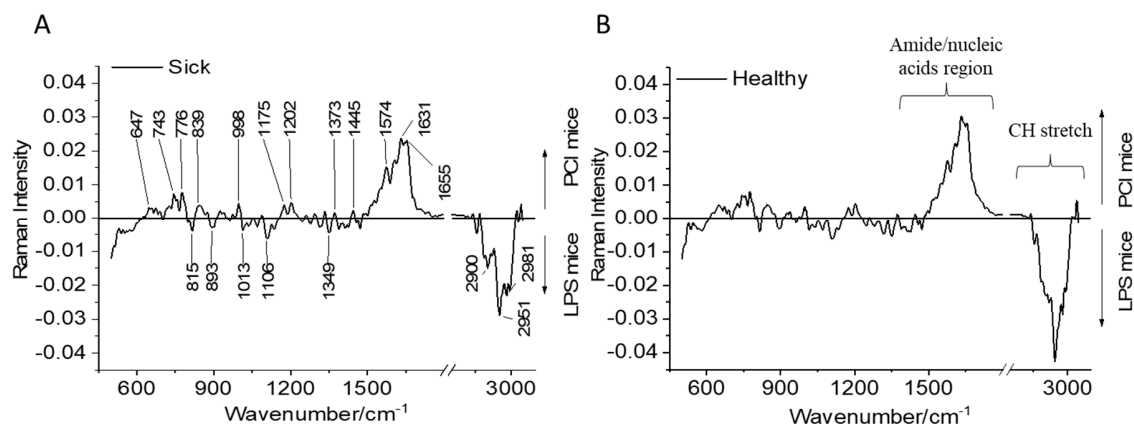

Figure S1: Raman difference spectra generated by subtracting C) mean Raman spectra of T-lymphocytes isolated from the spleen of endotoxin mice from septic mice. D) For comparison, the Raman difference spectra were generated by subtracting the mean Raman spectra of T-lymphocytes isolated from the spleen of healthy mice within the endotoxemia model and the PCI models.

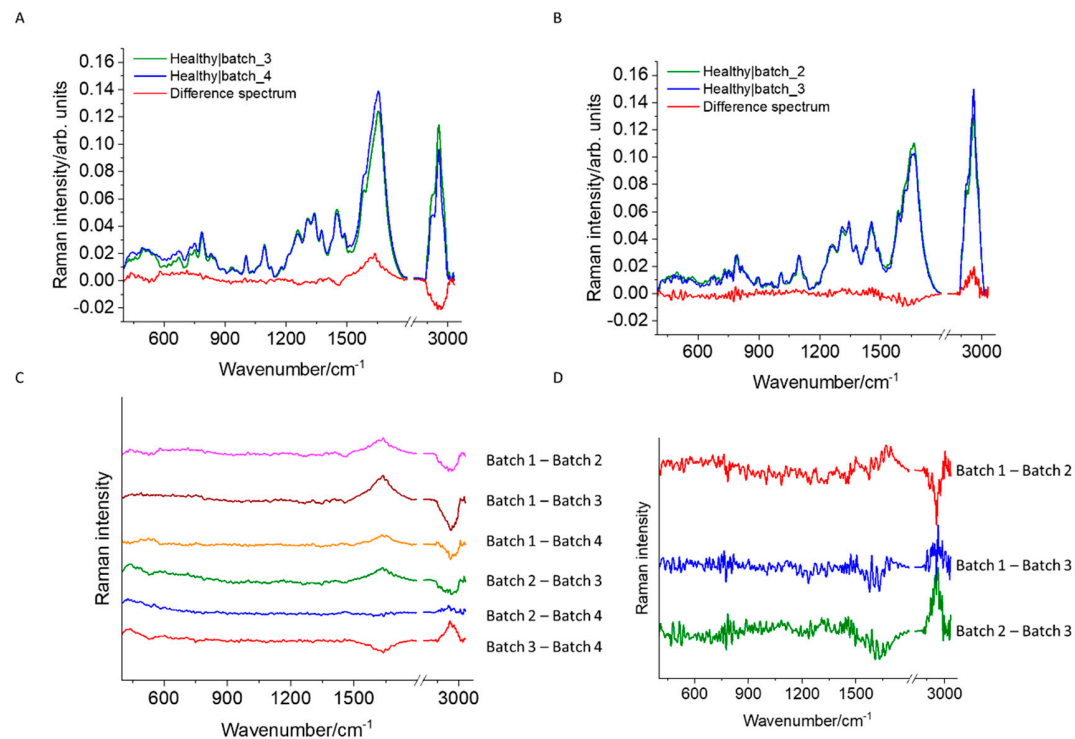

Figure S2: Raman difference spectra generated by subtracting mean Raman spectra of A) control mice from experimental batch 3 and batch 4 of the PCI model, B) control mice from experimental batch 2 and batch 3 of the endotoxemic model. Raman difference spectra for C) PCI model control mice from different experimental batches, D) endotoxemic model control mice from different experimental batches.

Table S1: A) Experimental details of T-cells isolated from the spleen of control mice, septic mice (PCI), and endotoxemic mice (LPS) showing the number of biological replicates, and gender of mice.

| Mice with LPS insult  |                        |                         |                      |
|-----------------------|------------------------|-------------------------|----------------------|
| Biological replicates | 9 to 12 mice/<br>batch | Post-LPS<br>insult time | Gender of mice       |
| Batch 1               | Pooled                 | One day                 | Females and<br>Males |
| Batch 2               | Pooled                 | One day                 | Females and<br>Males |

|                                                    |                                       |                             |                                    |
|----------------------------------------------------|---------------------------------------|-----------------------------|------------------------------------|
| Batch 3                                            | Pooled                                | One day                     | Females and<br>Males               |
| <b>Mice with PCI insult</b>                        |                                       |                             |                                    |
| <b>Biological replicates</b>                       | <b>Mice/batch</b>                     | <b>Post PCI insult time</b> | <b>Gender of mice</b>              |
| <b>Batch 1</b>                                     |                                       |                             |                                    |
| PCI_73646<br>PCI_73647<br>Sham_73670<br>Sham_73671 | 4 mice (2<br>control and 2<br>septic) | One day                     | Females                            |
| <b>Batch 2</b>                                     |                                       |                             |                                    |
| PCI_73648<br>PCI_73666<br>Sham_73678<br>Sham_73679 | 4 mice (2<br>control and 2<br>septic) | One day                     | Females<br>Males<br>Males<br>Males |
| <b>Batch 3</b>                                     |                                       |                             |                                    |
| PCI_73667<br>PCI_73668<br>Sham_73677<br>Sham_73680 | 4 mice (2<br>control and 2<br>septic) | One day                     | All males                          |
| <b>Batch 4</b>                                     |                                       |                             |                                    |
| PCI_73669<br>PCI_73681<br>Sham_73682<br>Sham_73683 | 4 mice (2<br>control and 2<br>septic) | One day                     | All males                          |
| <b>Batch 5</b>                                     |                                       |                             |                                    |
| PCI_73739<br>PCI_73740                             | 2 septic mice                         | One day                     | All females                        |

Table S2: Batch-wise confusion matrix of Raman models for differentiation of T-lymphocytes from sham and septic/inflammation mice.

| CLASSIFICATION MODELS<br>using 10-fold cross-validation | Balanced accuracy*/Cohen's kappa |           |           |                |           |           |
|---------------------------------------------------------|----------------------------------|-----------|-----------|----------------|-----------|-----------|
|                                                         | PCI mice model                   |           |           | LPS mice model |           |           |
|                                                         | PCA-LDA                          | PCA-RF    | PCA-SVM   | PCA-LDA        | PCA-RF    | PCA-SVM   |
| BATCH 1                                                 | 0.85/0.71                        | 0.86/0.72 | 0.85/0.71 | 0.60/0.19      | 0.60/0.19 | 0.62/0.23 |
| BATCH 2                                                 | 0.67/0.33                        | 0.76/0.52 | 0.77/0.53 | 0.82/0.64      | 0.83/0.66 | 0.87/0.74 |
| BATCH 3                                                 | 0.72/0.43                        | 0.76/0.52 | 0.81/0.60 | 0.71/0.42      | 0.71/0.42 | 0.72/0.44 |
| BATCH 4                                                 | 0.84/0.67                        | 0.83/0.66 | 0.82/0.63 | -              | -         | -         |

\*Balanced accuracy is the mean sensitivity

Table S3: Confusion matrix obtained from PCA-LDA classification model built to differentiate T-lymphocytes from sham and infected mice from PCI model.

| PCA-LDA classification model (batches 2 to 5) for PCI using batch-wise cross-validation |                                                    |          |      |      |               |          |      |      |
|-----------------------------------------------------------------------------------------|----------------------------------------------------|----------|------|------|---------------|----------|------|------|
|                                                                                         | Confusion matrix for individual aggregated spectra |          |      |      | Majority vote |          |      |      |
| True/Predicted                                                                          | Sham                                               | Infected | Sens | Spec | Sham          | Infected | Sens | Spec |
| Sham                                                                                    | 356                                                | 264      | 0.57 | 0.75 | 1             | 0        | 1    | 1    |
| Infected                                                                                | 174                                                | 519      | 0.75 | 0.57 | 0             | 1        | 1    | 1    |
| Balanced accuracy*<br>/Cohen's kappa                                                    | 0.67/0.33                                          |          |      |      | 1/1           |          |      |      |
| *Balanced accuracy is mean sensitivity, Sens: sensitivity, Spec: specificity            |                                                    |          |      |      |               |          |      |      |

Table S4: Confusion matrix obtained from PCA-LDA prediction of T-lymphocytes from septic mice.

| PCA-LDA prediction model (batch 1) for PCI                                   |                                                    |          |      |      |               |          |      |      |
|------------------------------------------------------------------------------|----------------------------------------------------|----------|------|------|---------------|----------|------|------|
|                                                                              | Confusion matrix for individual aggregated spectra |          |      |      | Majority vote |          |      |      |
| True/Predicted                                                               | Sham                                               | Infected | Sens | Spec | Sham          | Infected | Sens | Spec |
| Sham                                                                         | 134                                                | 49       | 0.73 | 0.85 | 1             | 0        | 1    | 1    |
| Infected                                                                     | 23                                                 | 130      | 0.85 | 0.73 | 0             | 1        | 1    | 1    |
| Balanced accuracy*<br>/Cohen's kappa                                         | 0.79/0.57                                          |          |      |      | 1/1           |          |      |      |
| *Balanced accuracy is mean sensitivity, Sens: sensitivity, Spec: specificity |                                                    |          |      |      |               |          |      |      |

Table S5: Confusion matrix obtained from PCA-LDA classification model built to differentiate T-lymphocytes from sham and infected mice from LPS model.

| PCA-LDA classification model (batches 1 and 3) for LPS using batch-wise cross-validation |                                                    |          |      |      |               |          |      |      |
|------------------------------------------------------------------------------------------|----------------------------------------------------|----------|------|------|---------------|----------|------|------|
|                                                                                          | Confusion matrix for individual aggregated spectra |          |      |      | Majority vote |          |      |      |
| True/Predicted                                                                           | Sham                                               | Infected | Sens | Spec | Sham          | Infected | Sens | Spec |
| Sham                                                                                     | 1535                                               | 33       | 0.98 | 0.04 | 1             | 0        | 1    | 0    |
| Infected                                                                                 | 1398                                               | 51       | 0.04 | 0.98 | 1             | 0        | 0    | 1    |
| Balanced accuracy*<br>/Cohen's kappa                                                     | 0.51/0.02                                          |          |      |      | 0.50/0        |          |      |      |
| *Balanced accuracy is mean sensitivity, Sens: sensitivity, Spec: specificity             |                                                    |          |      |      |               |          |      |      |

Table S6: Confusion matrix obtained from PCA-LDA prediction of T-lymphocytes from LPS mice.

| PCA-LDA prediction model (batch 2) for LPS                                   |                                                    |          |      |      |               |          |      |      |
|------------------------------------------------------------------------------|----------------------------------------------------|----------|------|------|---------------|----------|------|------|
|                                                                              | Confusion matrix for individual aggregated spectra |          |      |      | Majority vote |          |      |      |
| True/Predicted                                                               | Sham                                               | Infected | Sens | Spec | Sham          | Infected | Sens | Spec |
| Sham                                                                         | 78                                                 | 595      | 0.12 | 0.68 | 0             | 1        | 0    | 1    |
| Infected                                                                     | 230                                                | 497      | 0.68 | 0.12 | 0             | 1        | 1    | 0    |
| Balanced accuracy*<br>/Cohen's kappa                                         | 0.4/-0.21                                          |          |      |      | 0.50/0        |          |      |      |
| *Balanced accuracy is mean sensitivity, Sens: sensitivity, Spec: specificity |                                                    |          |      |      |               |          |      |      |
